# Supplementary figures and images for: Near-Optimal Pricing and Resource Allocation in a Large-Scale Service System
Source: Atypon-hosted journal article supplement (doi:10.1287/opre.2024.1073), 2025-10-15

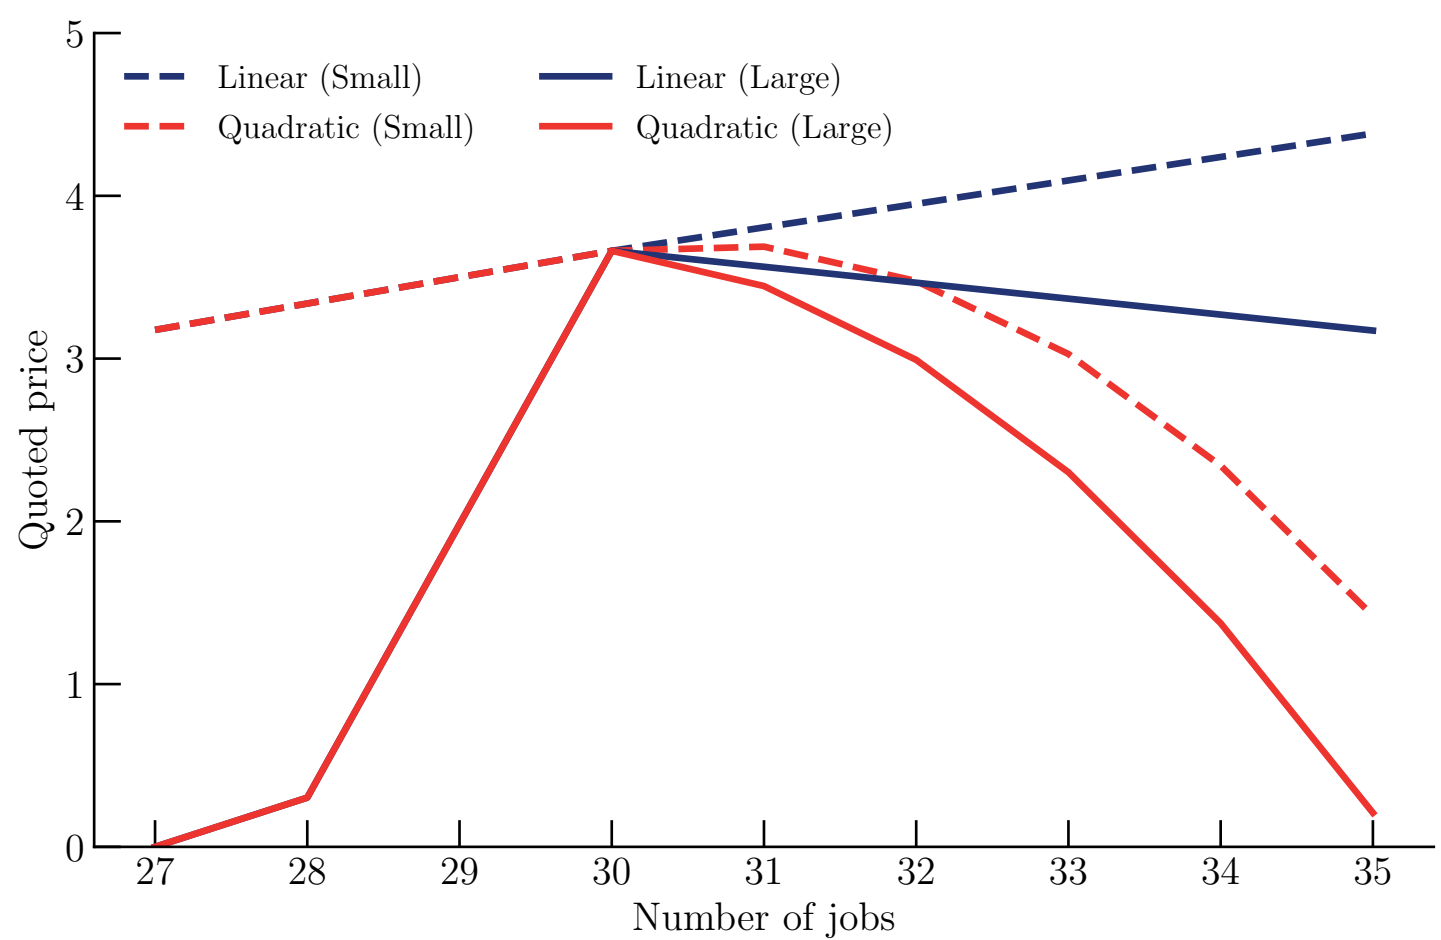

Supplement: opre.2024.1073.cd.zip [file 2.pdf › Figures/2.pdf]

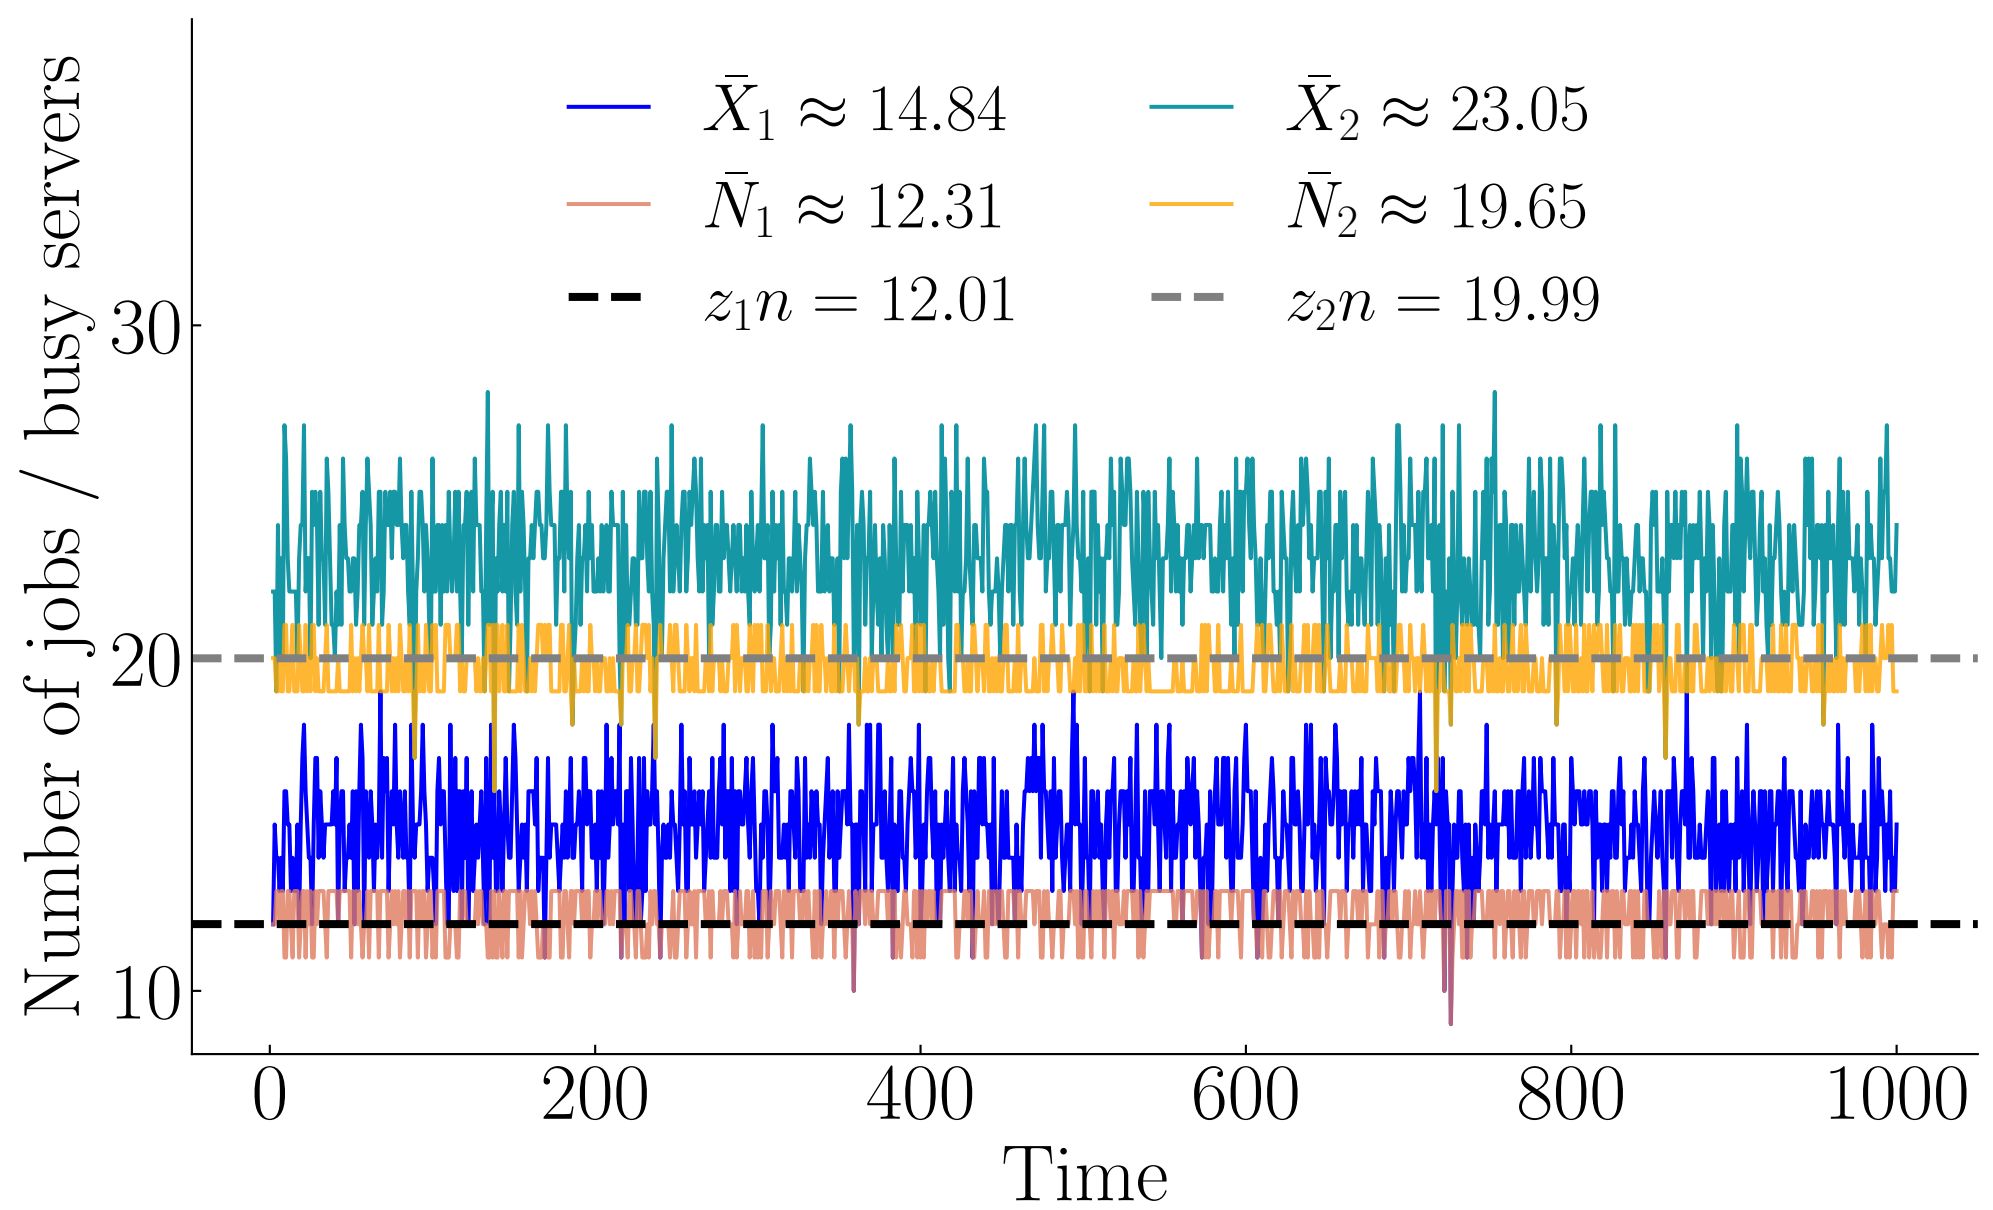

Supplement: opre.2024.1073.cd.zip [file 3a.pdf › Figures/3a.pdf]

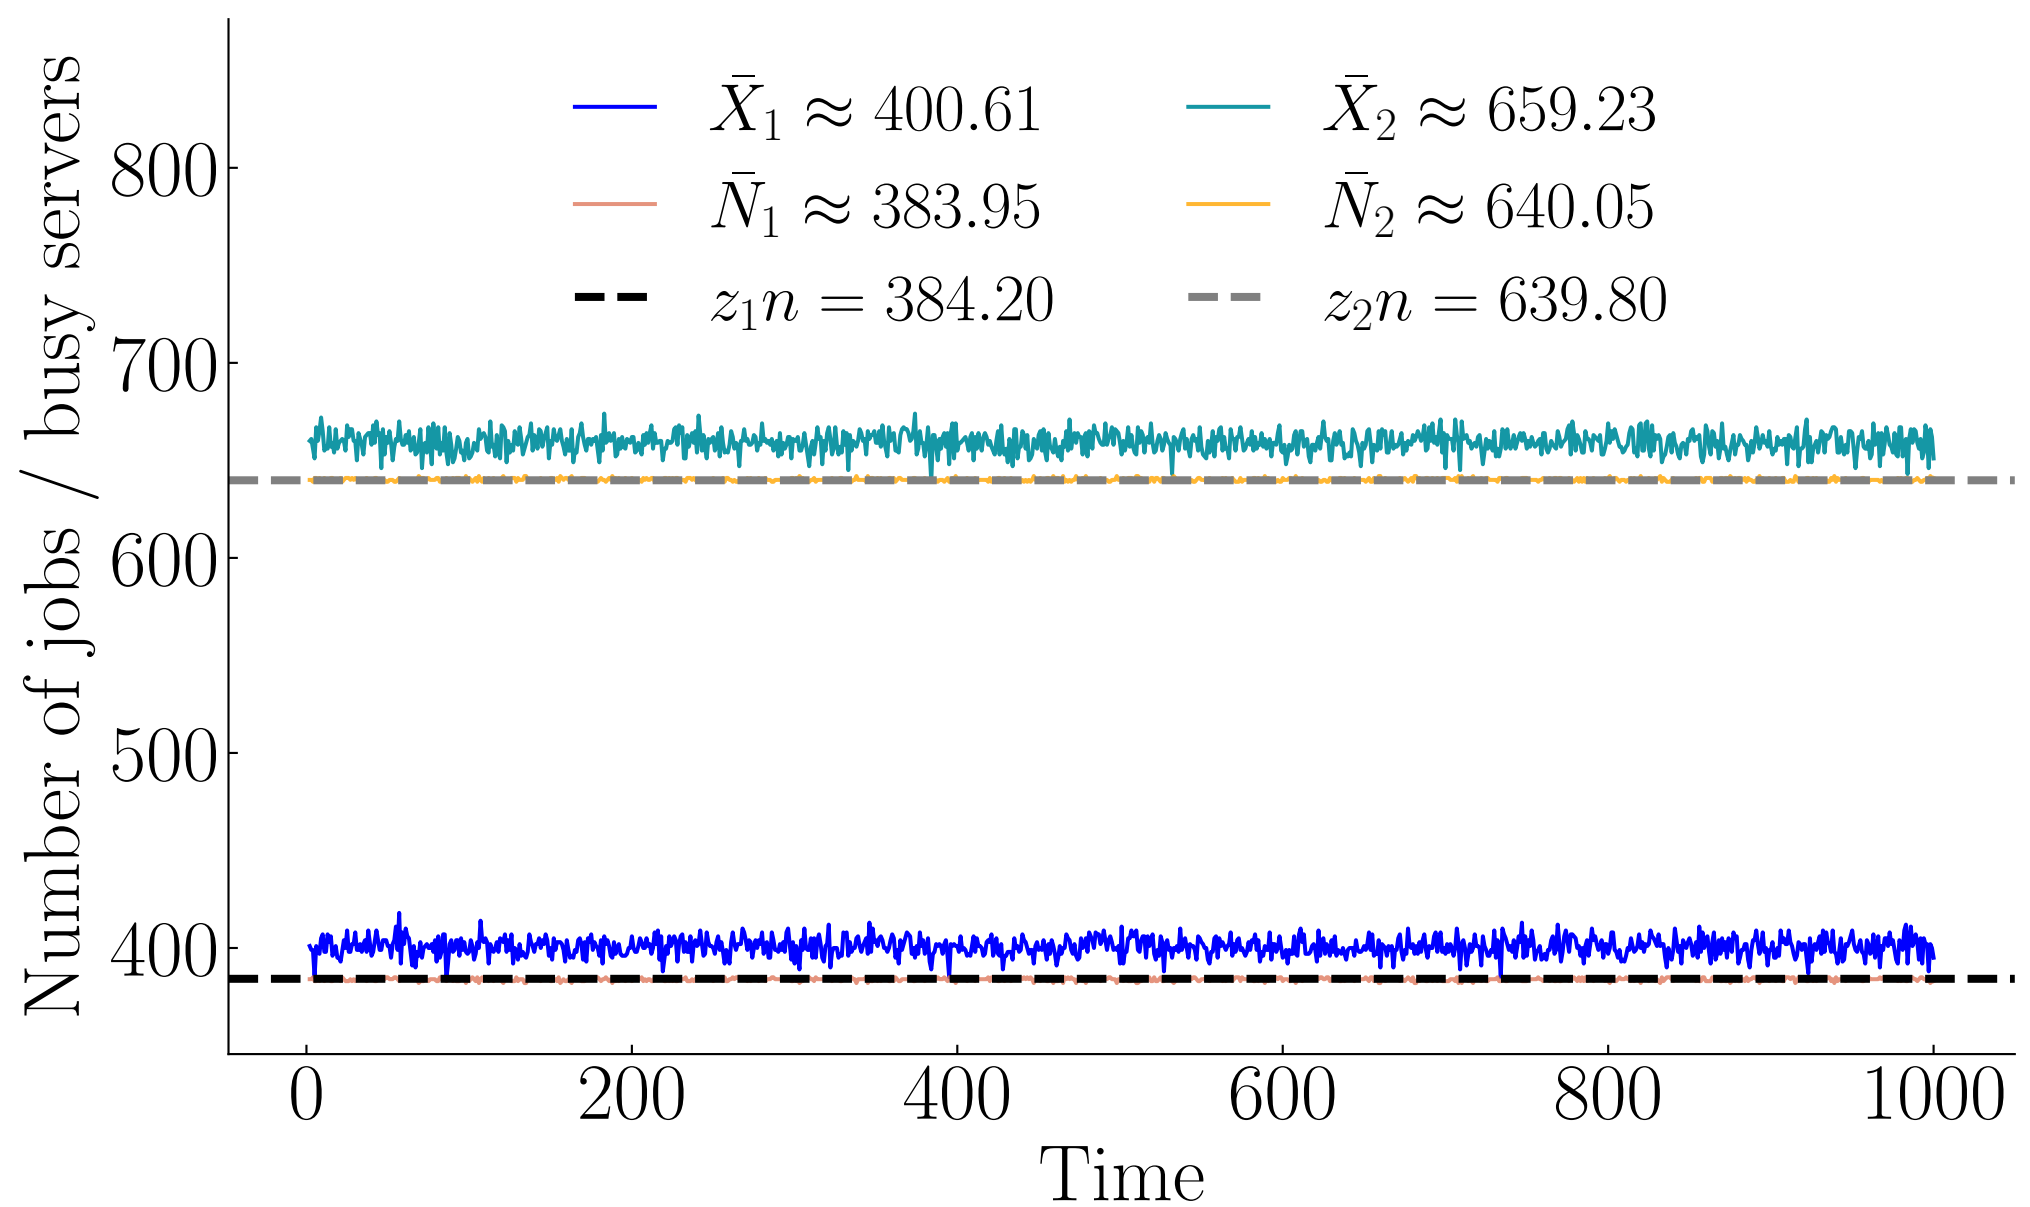

Supplement: opre.2024.1073.cd.zip [file 3b.pdf › Figures/3b.pdf]

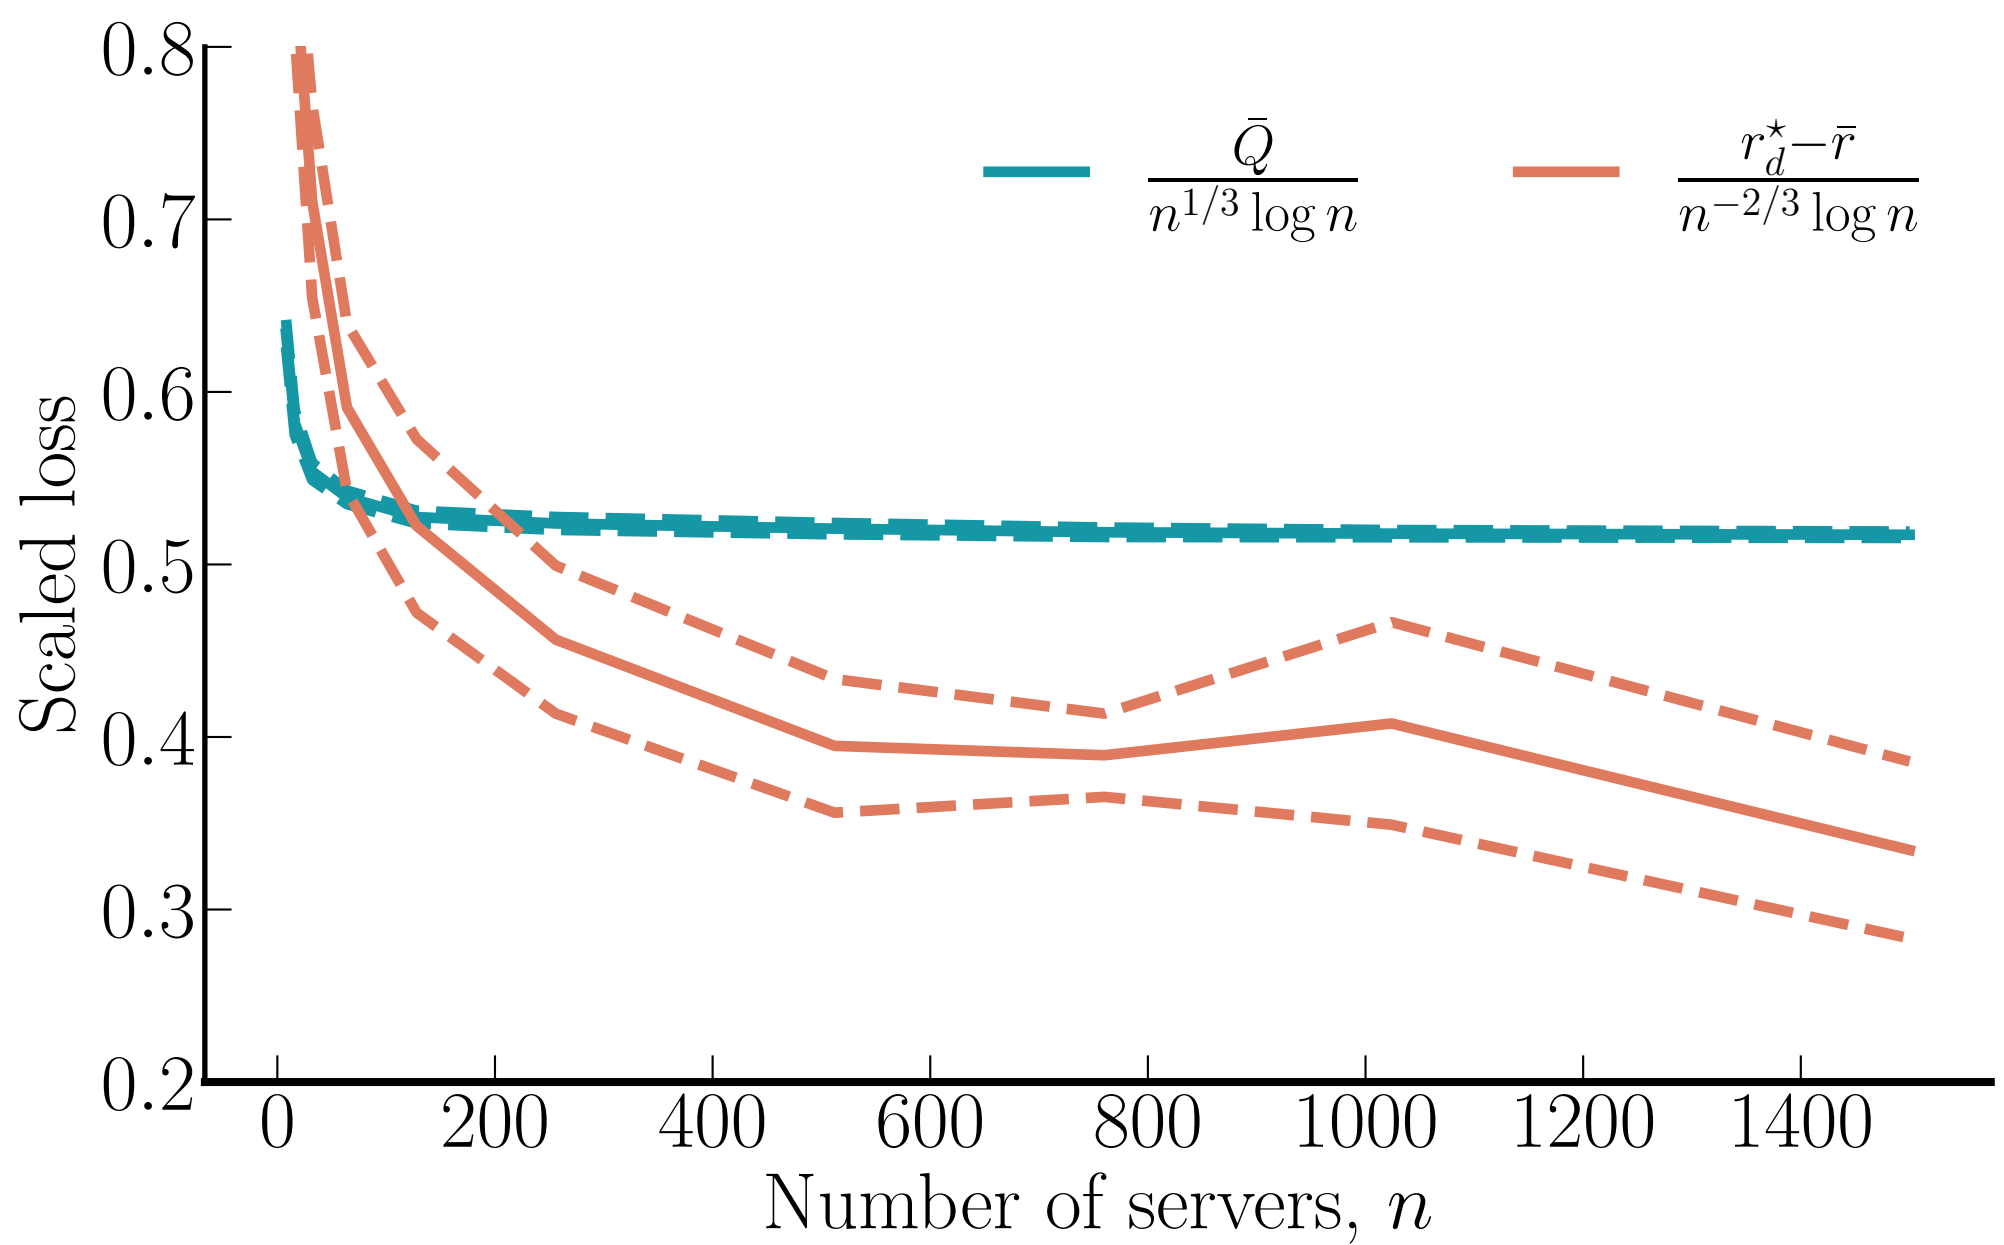

Supplement: opre.2024.1073.cd.zip [file 4.pdf › Figures/4.pdf]

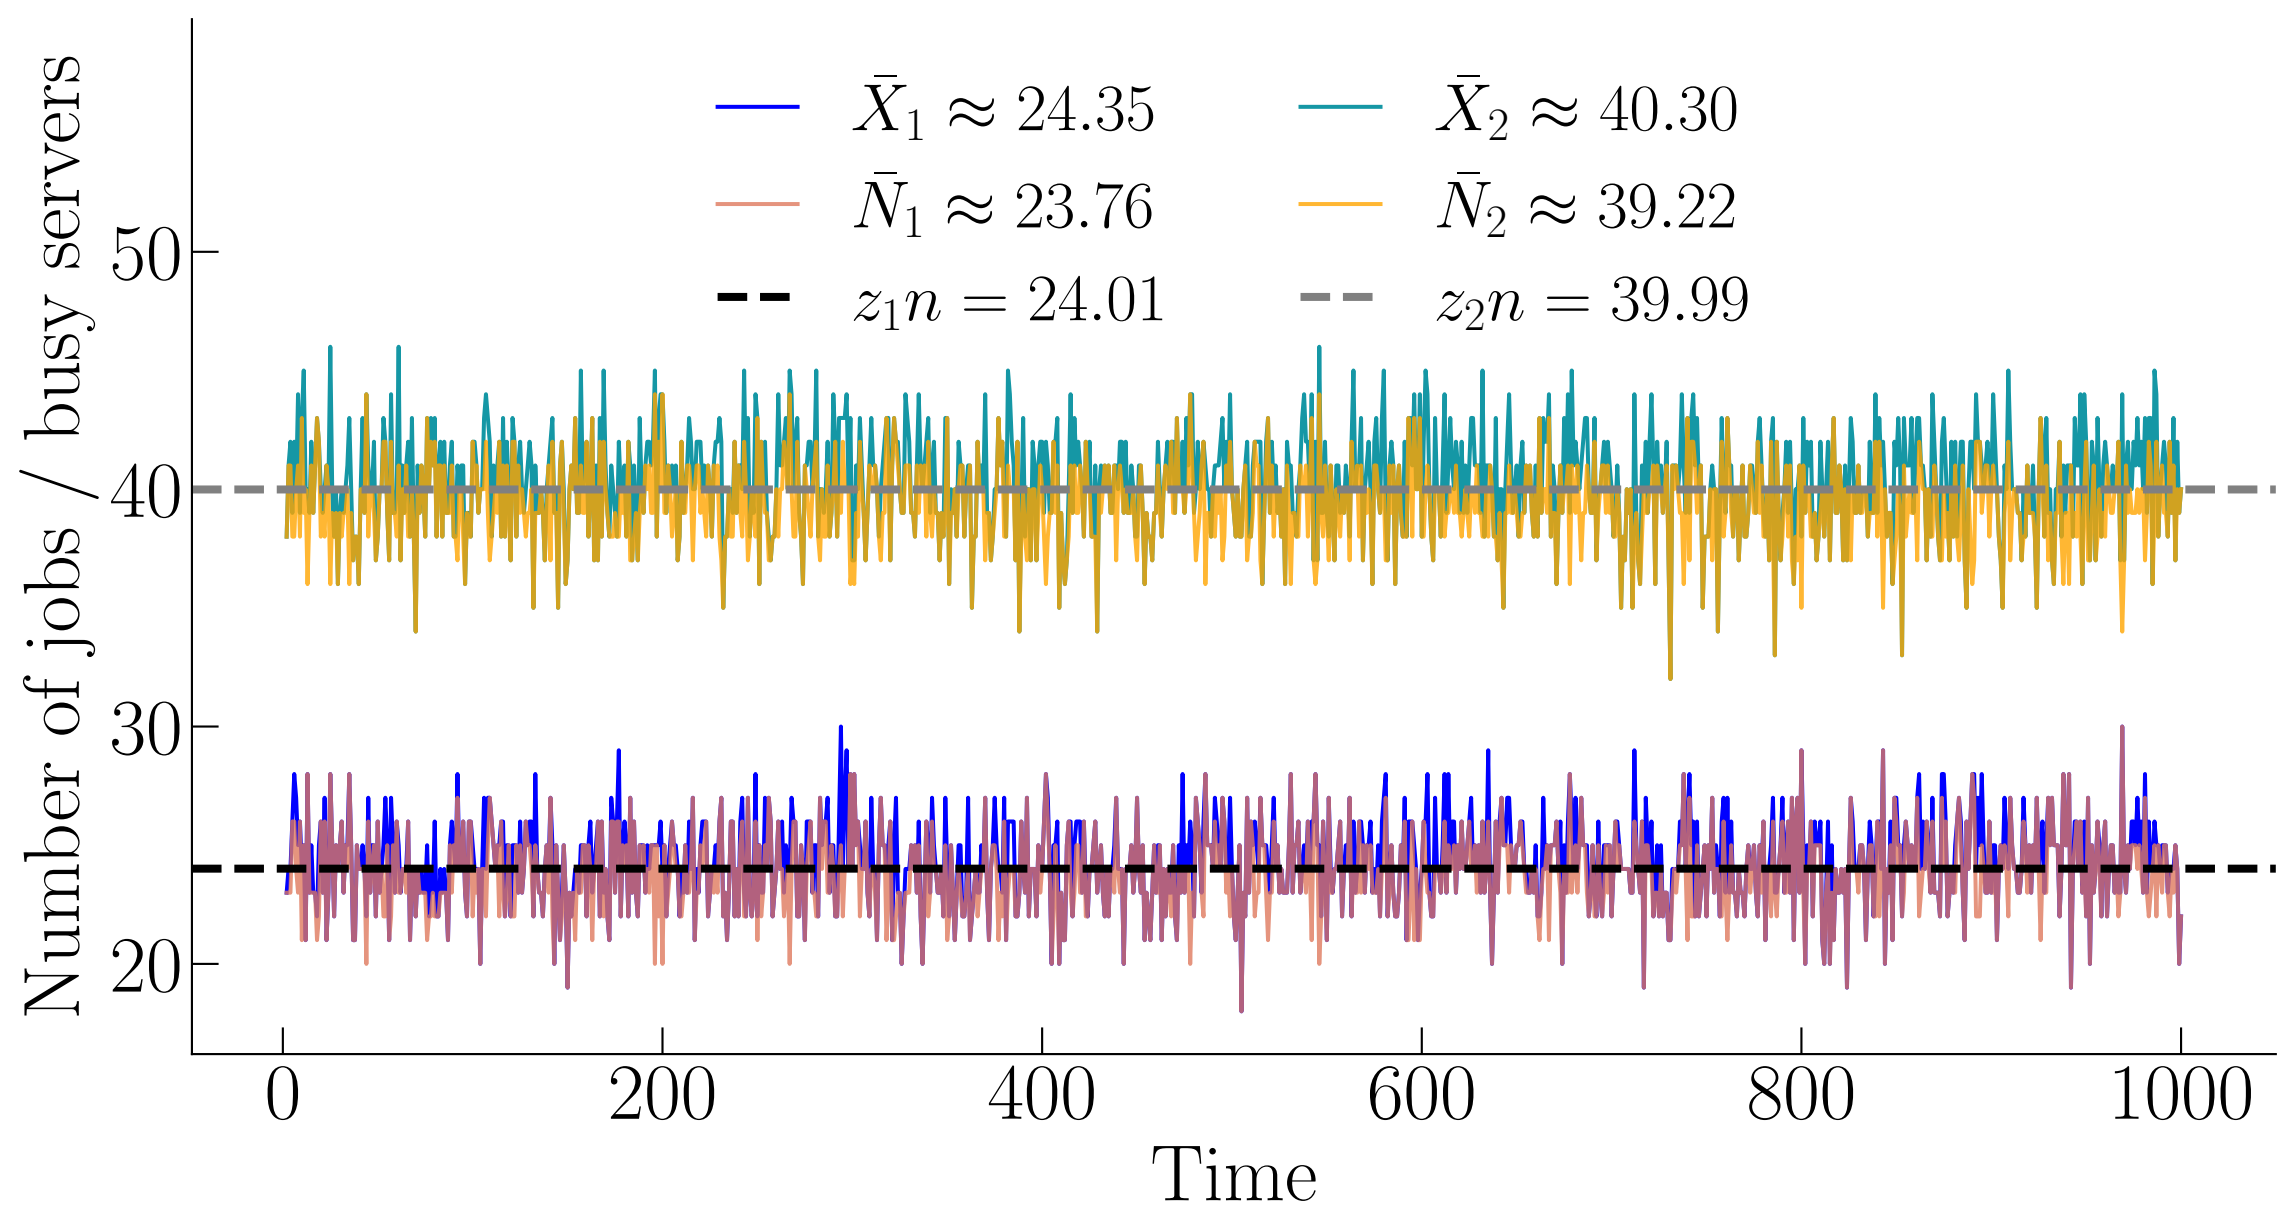

Supplement: opre.2024.1073.cd.zip [file 5a.pdf › Figures/5a.pdf]

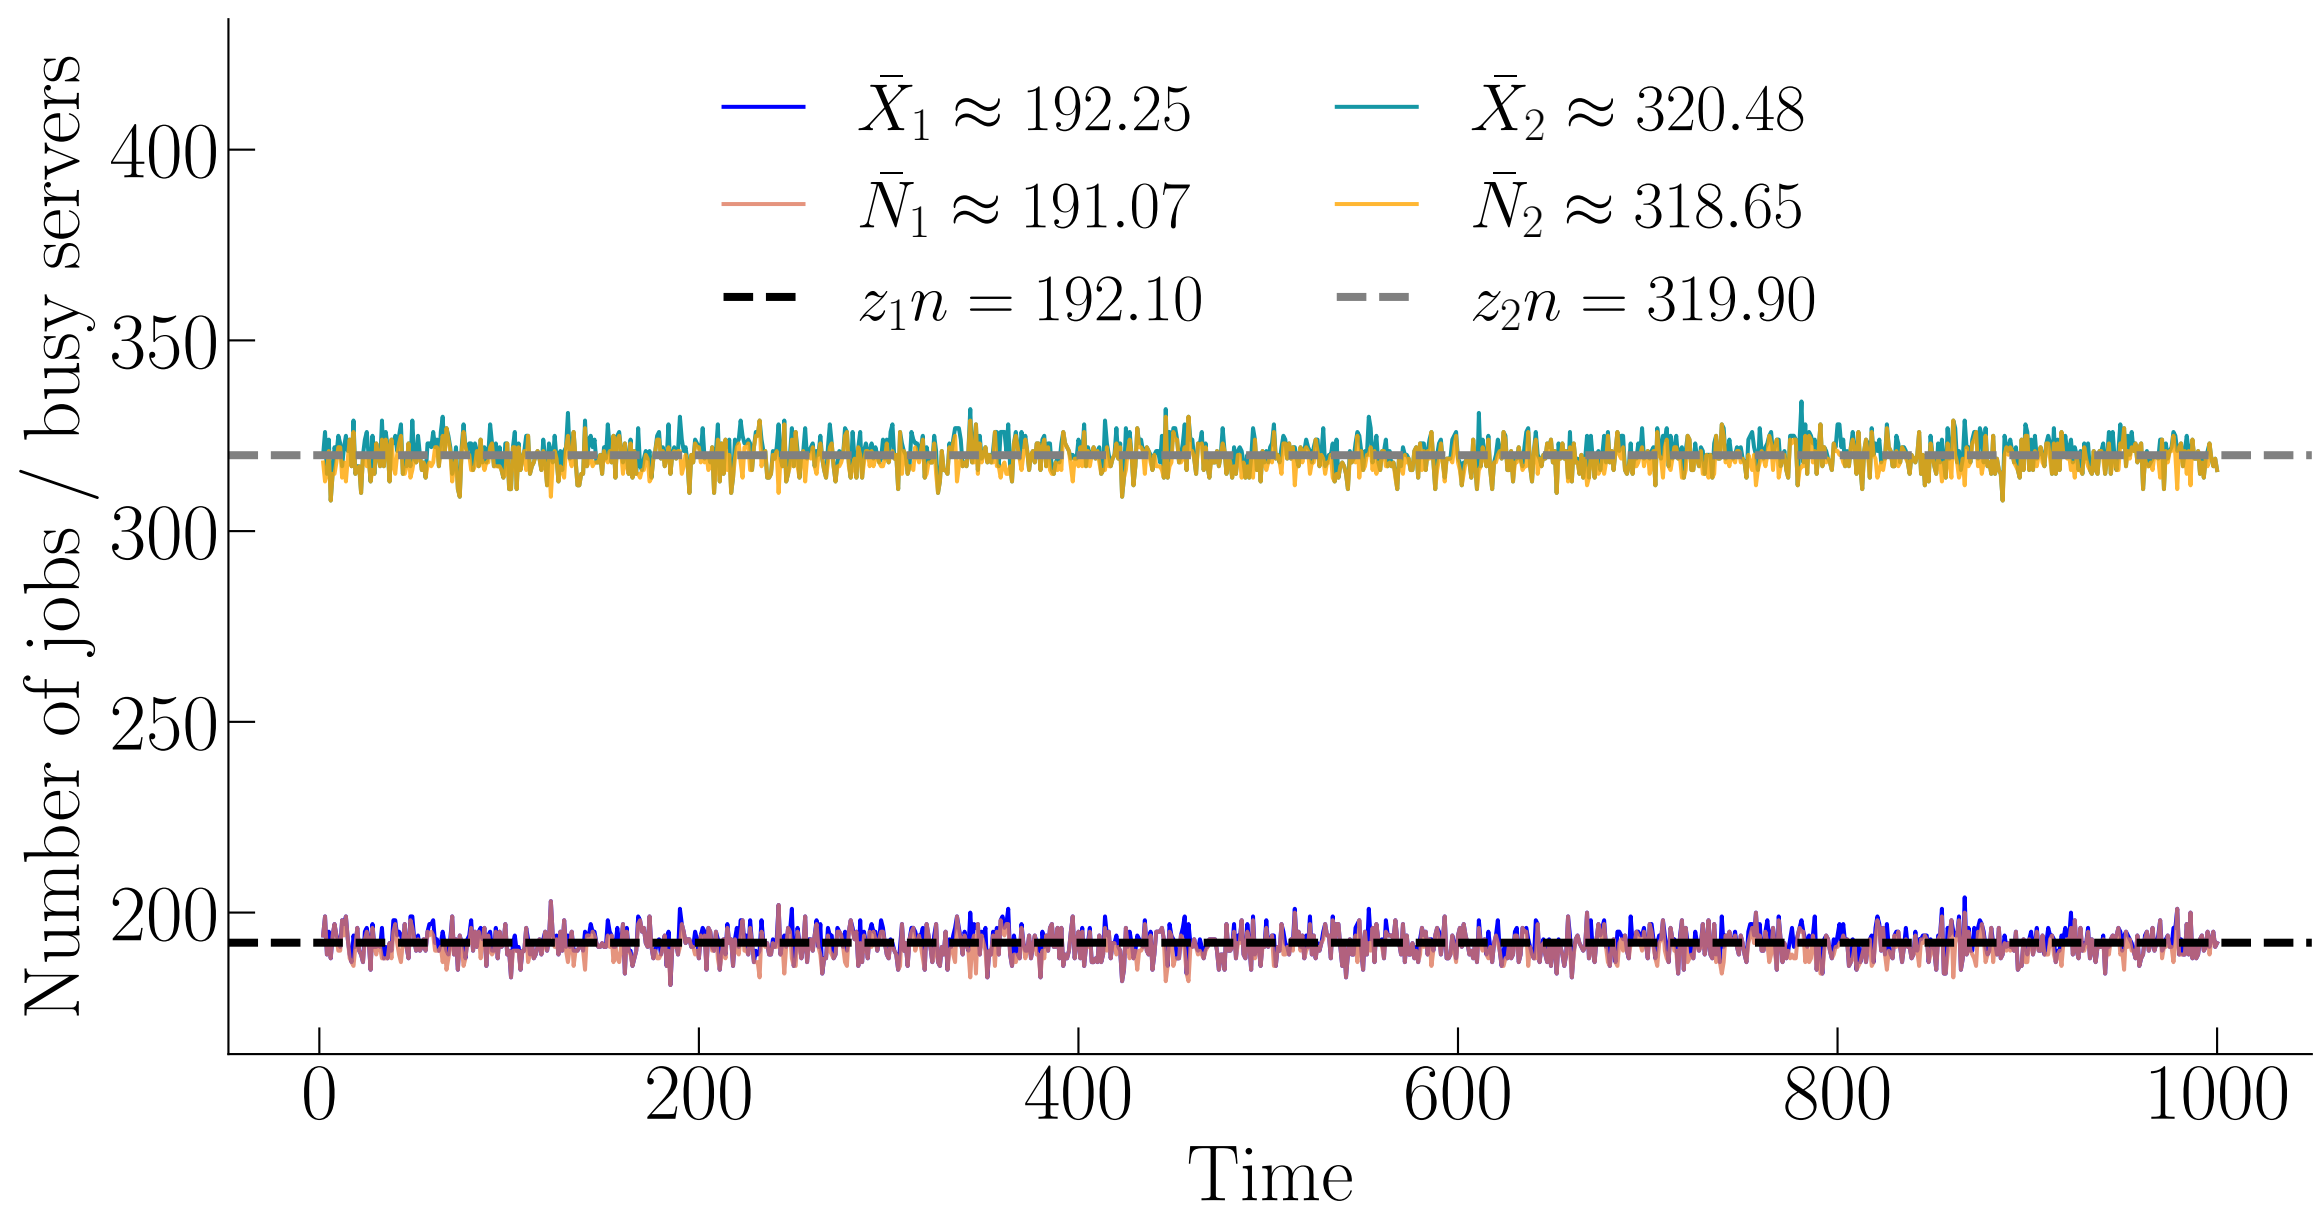

Supplement: opre.2024.1073.cd.zip [file 5b.pdf › Figures/5b.pdf]

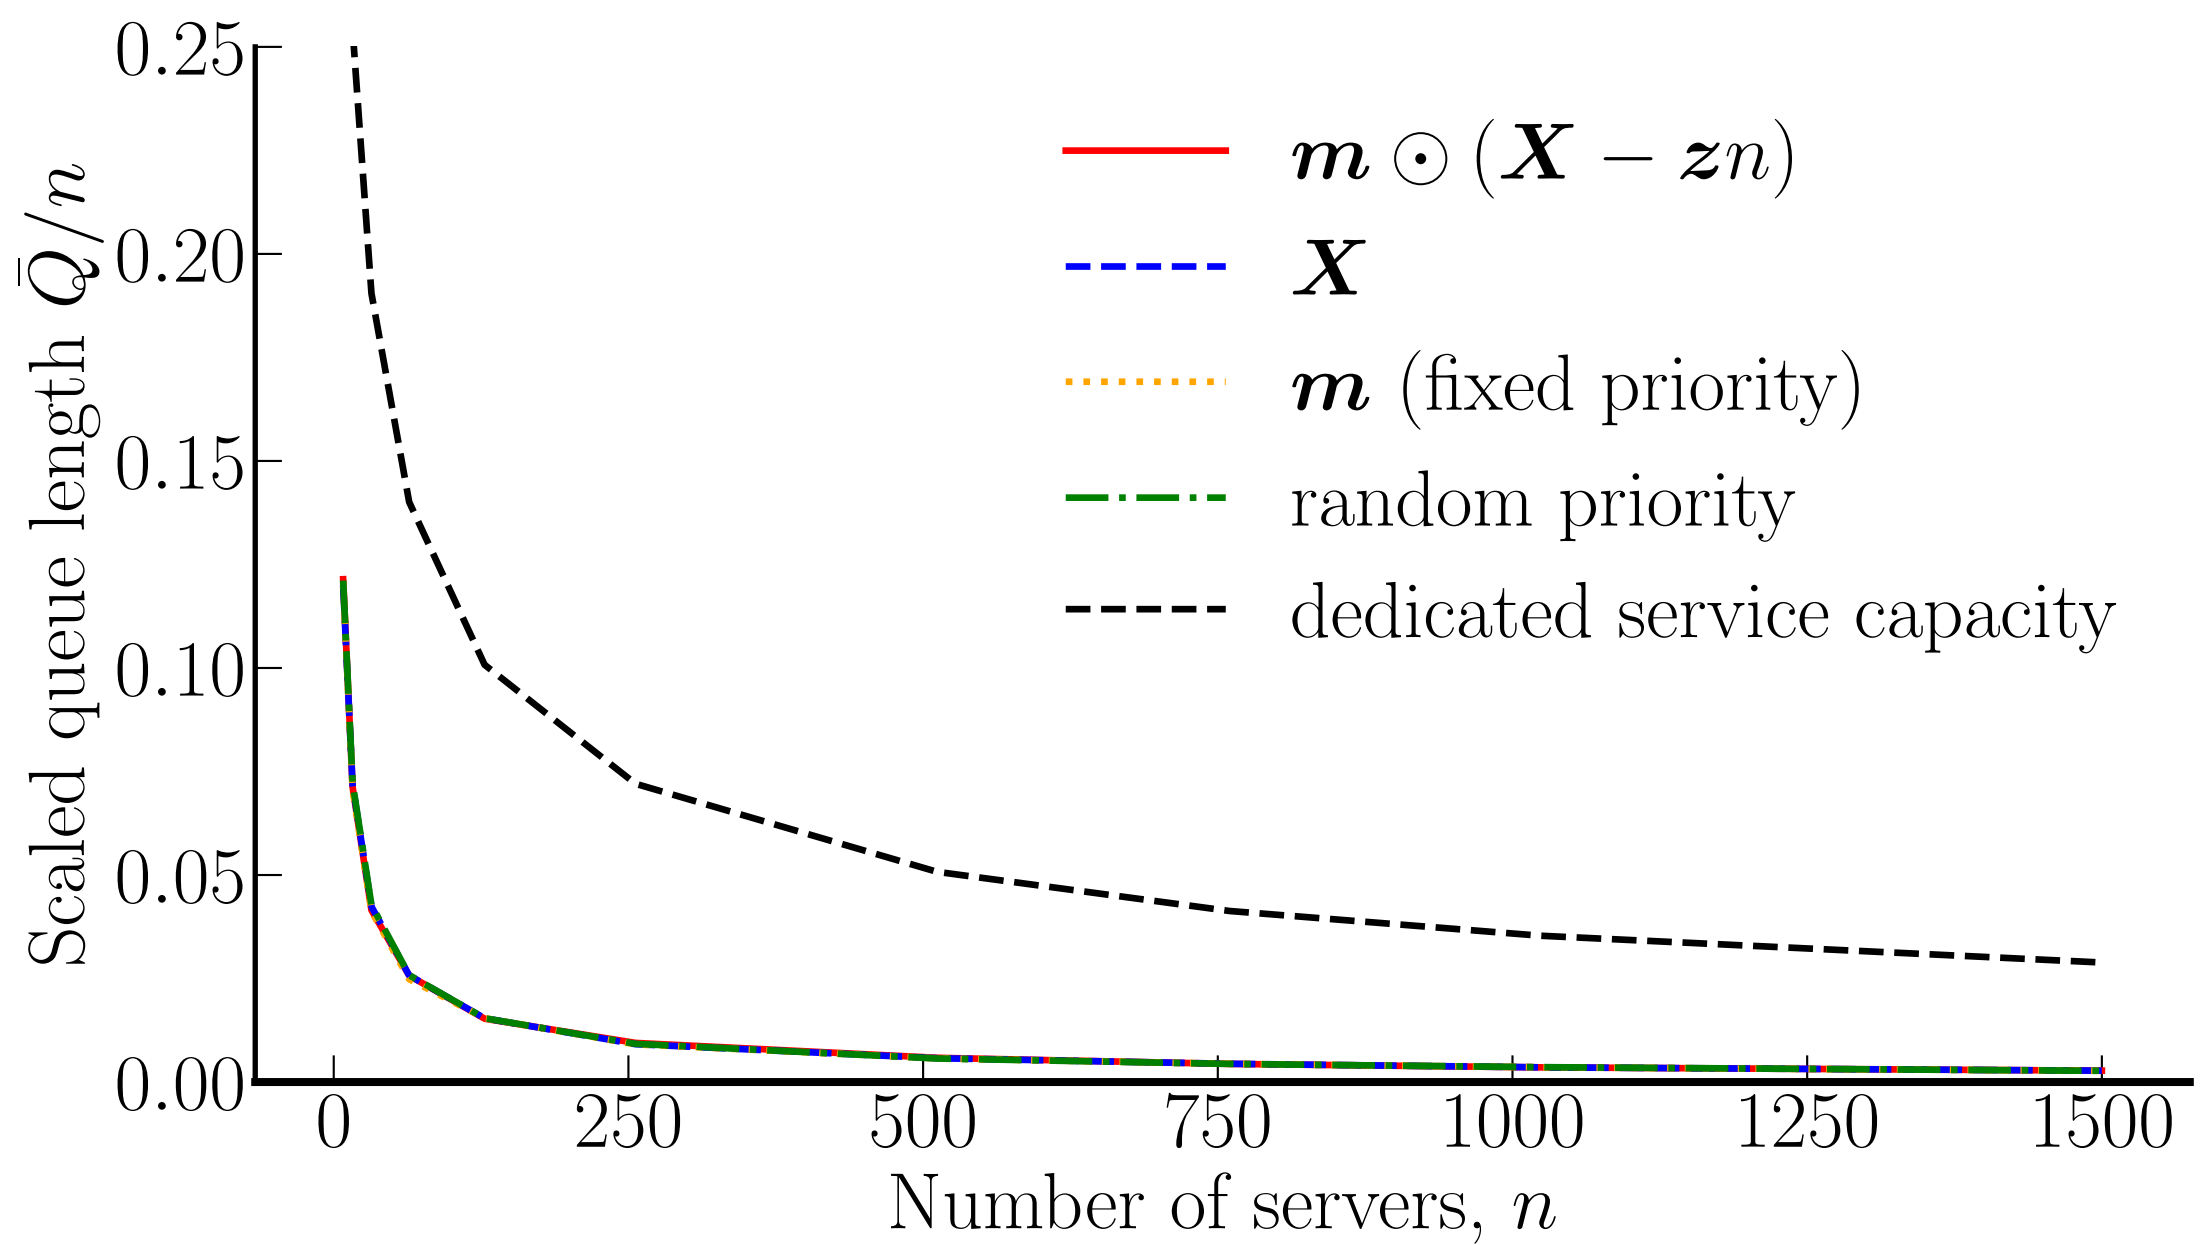

Supplement: opre.2024.1073.cd.zip [file 6a.pdf › Figures/6a.pdf]

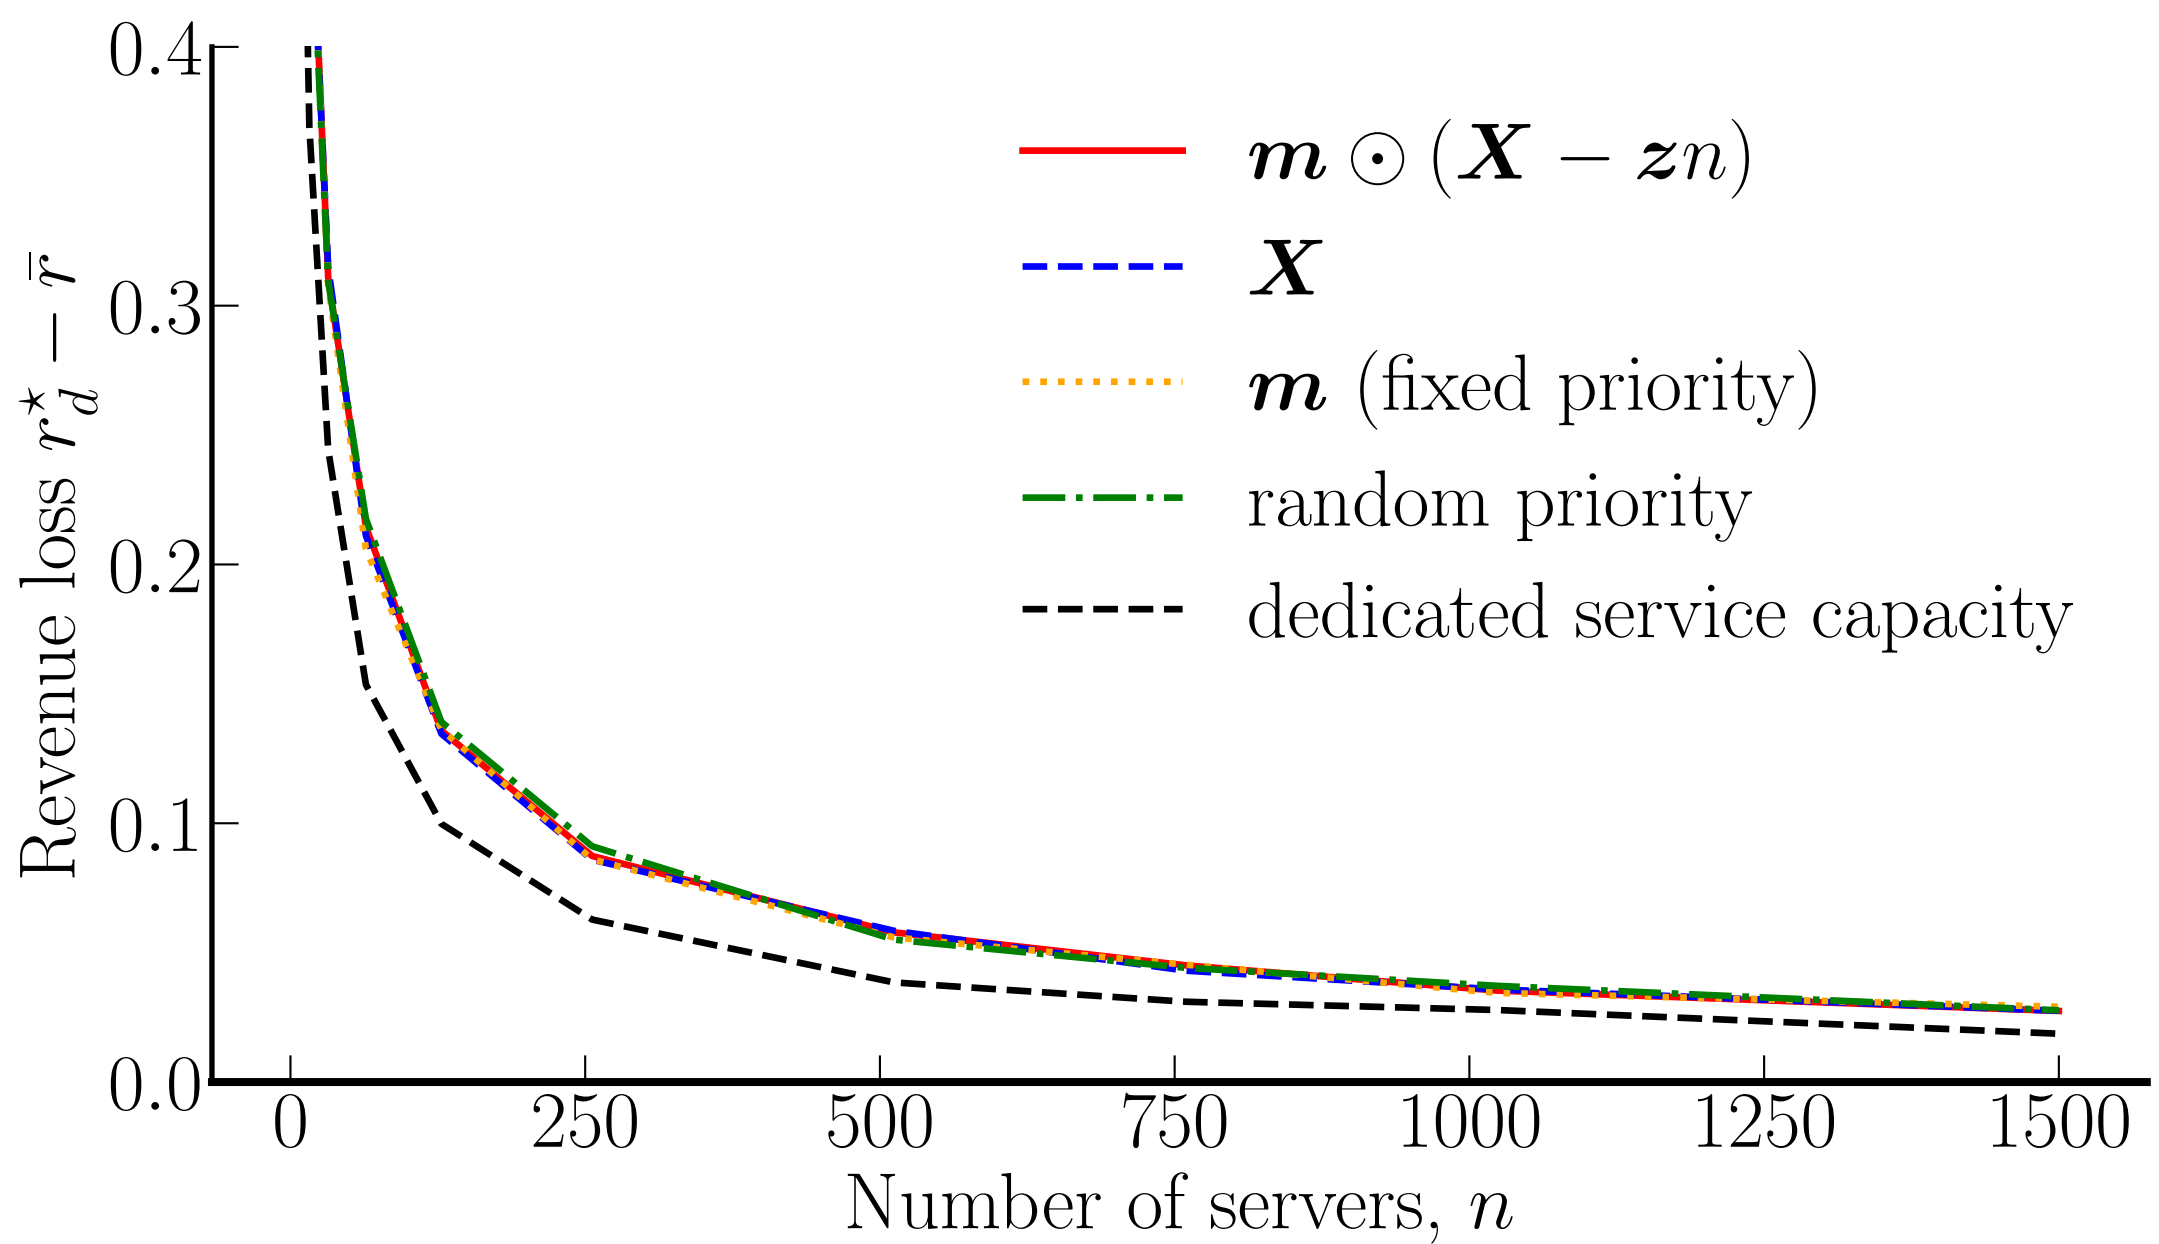

Supplement: opre.2024.1073.cd.zip [file 6b.pdf › Figures/6b.pdf]

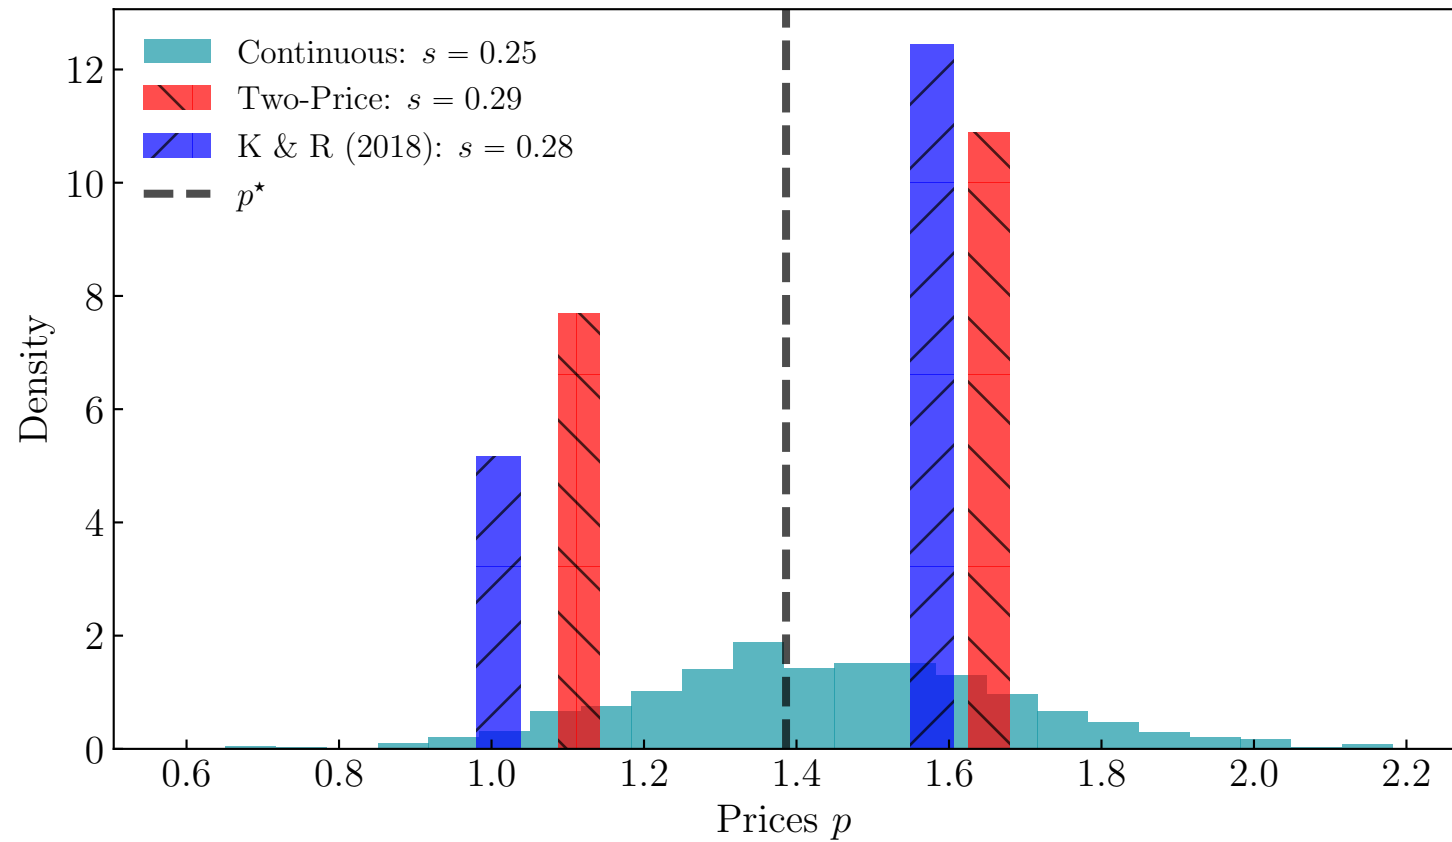

Supplement: opre.2024.1073.cd.zip [file EC1.pdf › Figures/EC1.pdf]

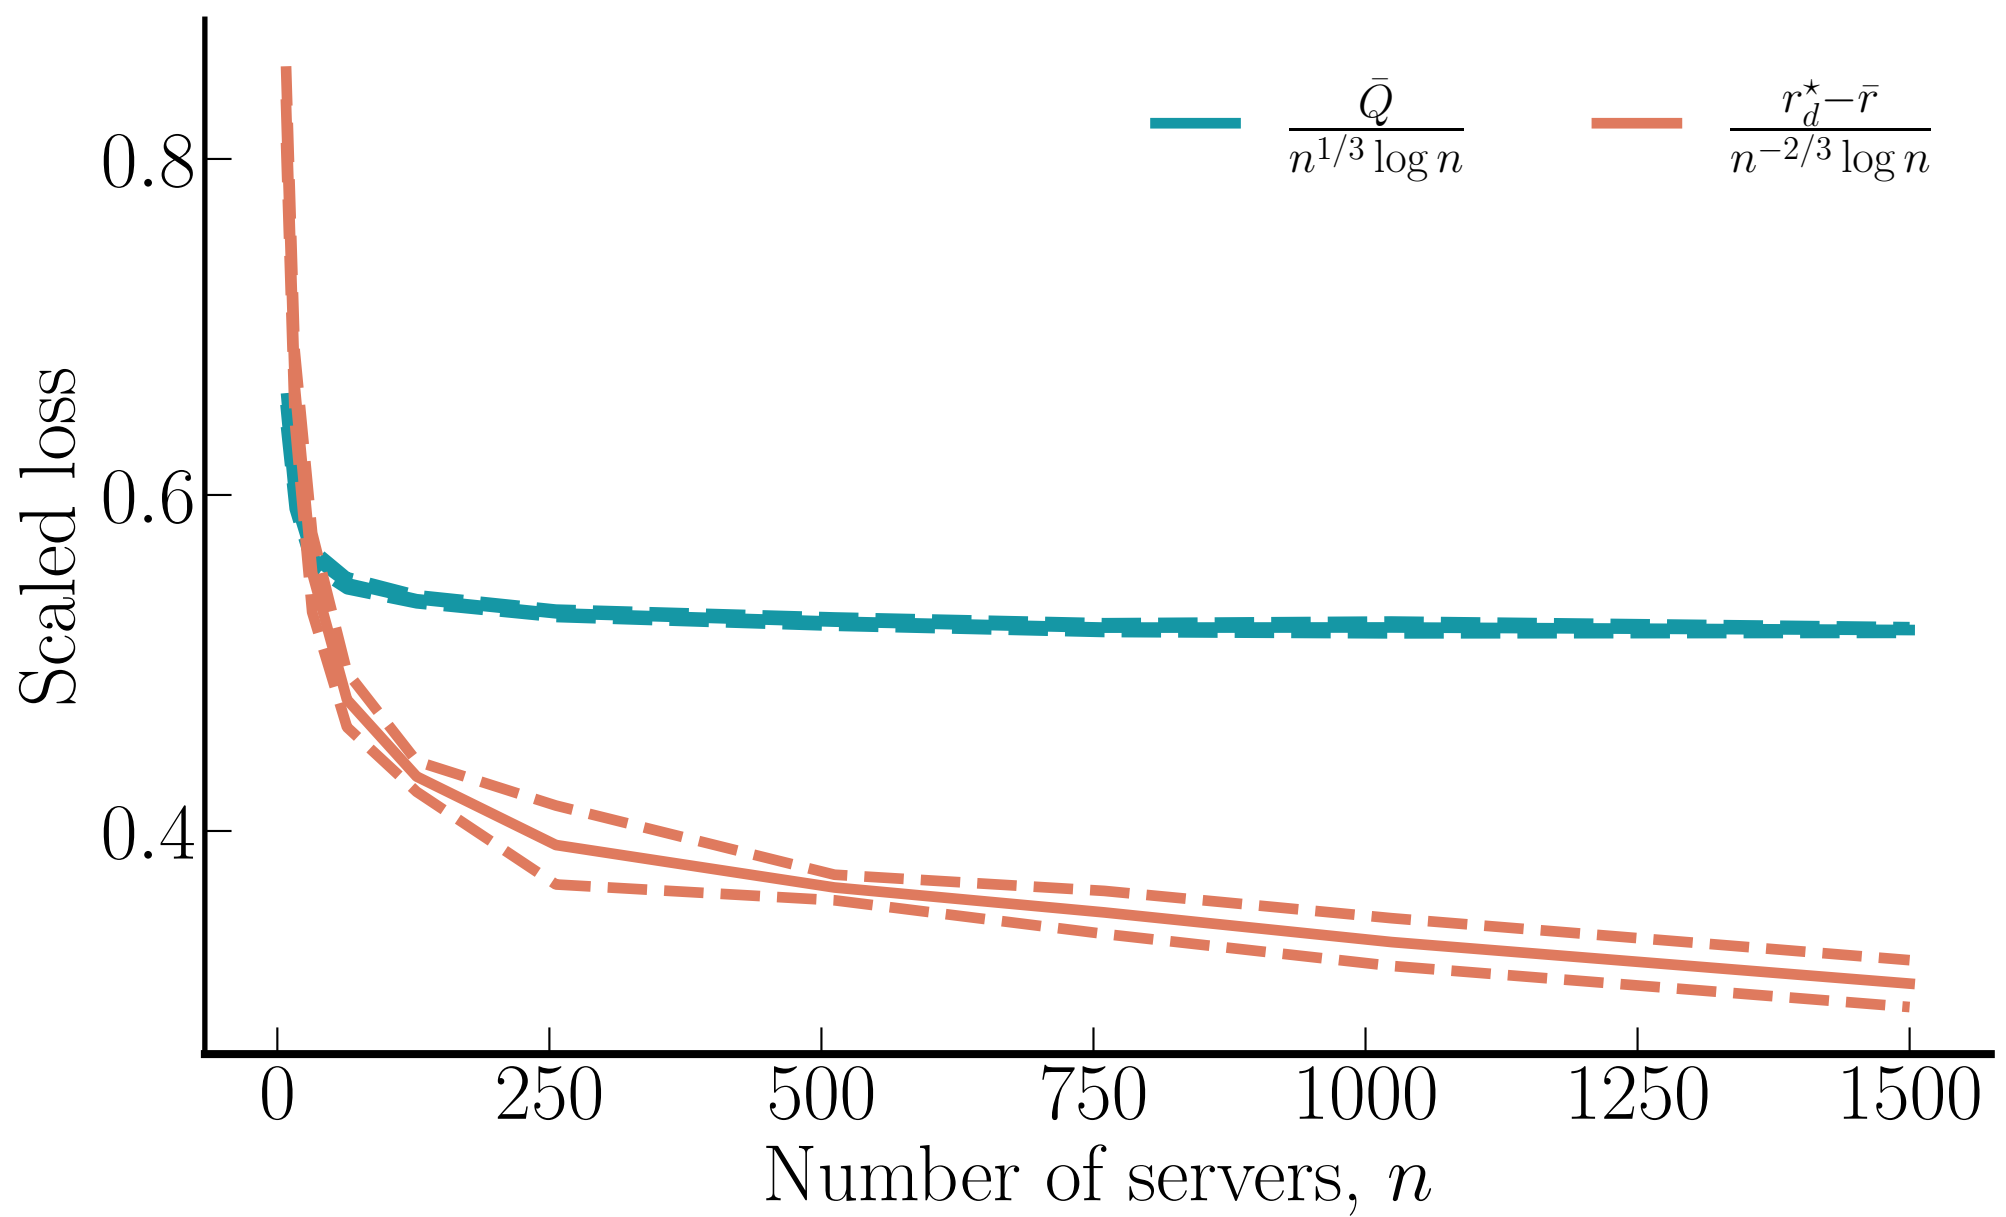

Supplement: opre.2024.1073.cd.zip [file EC2a.pdf › Figures/EC2a.pdf]

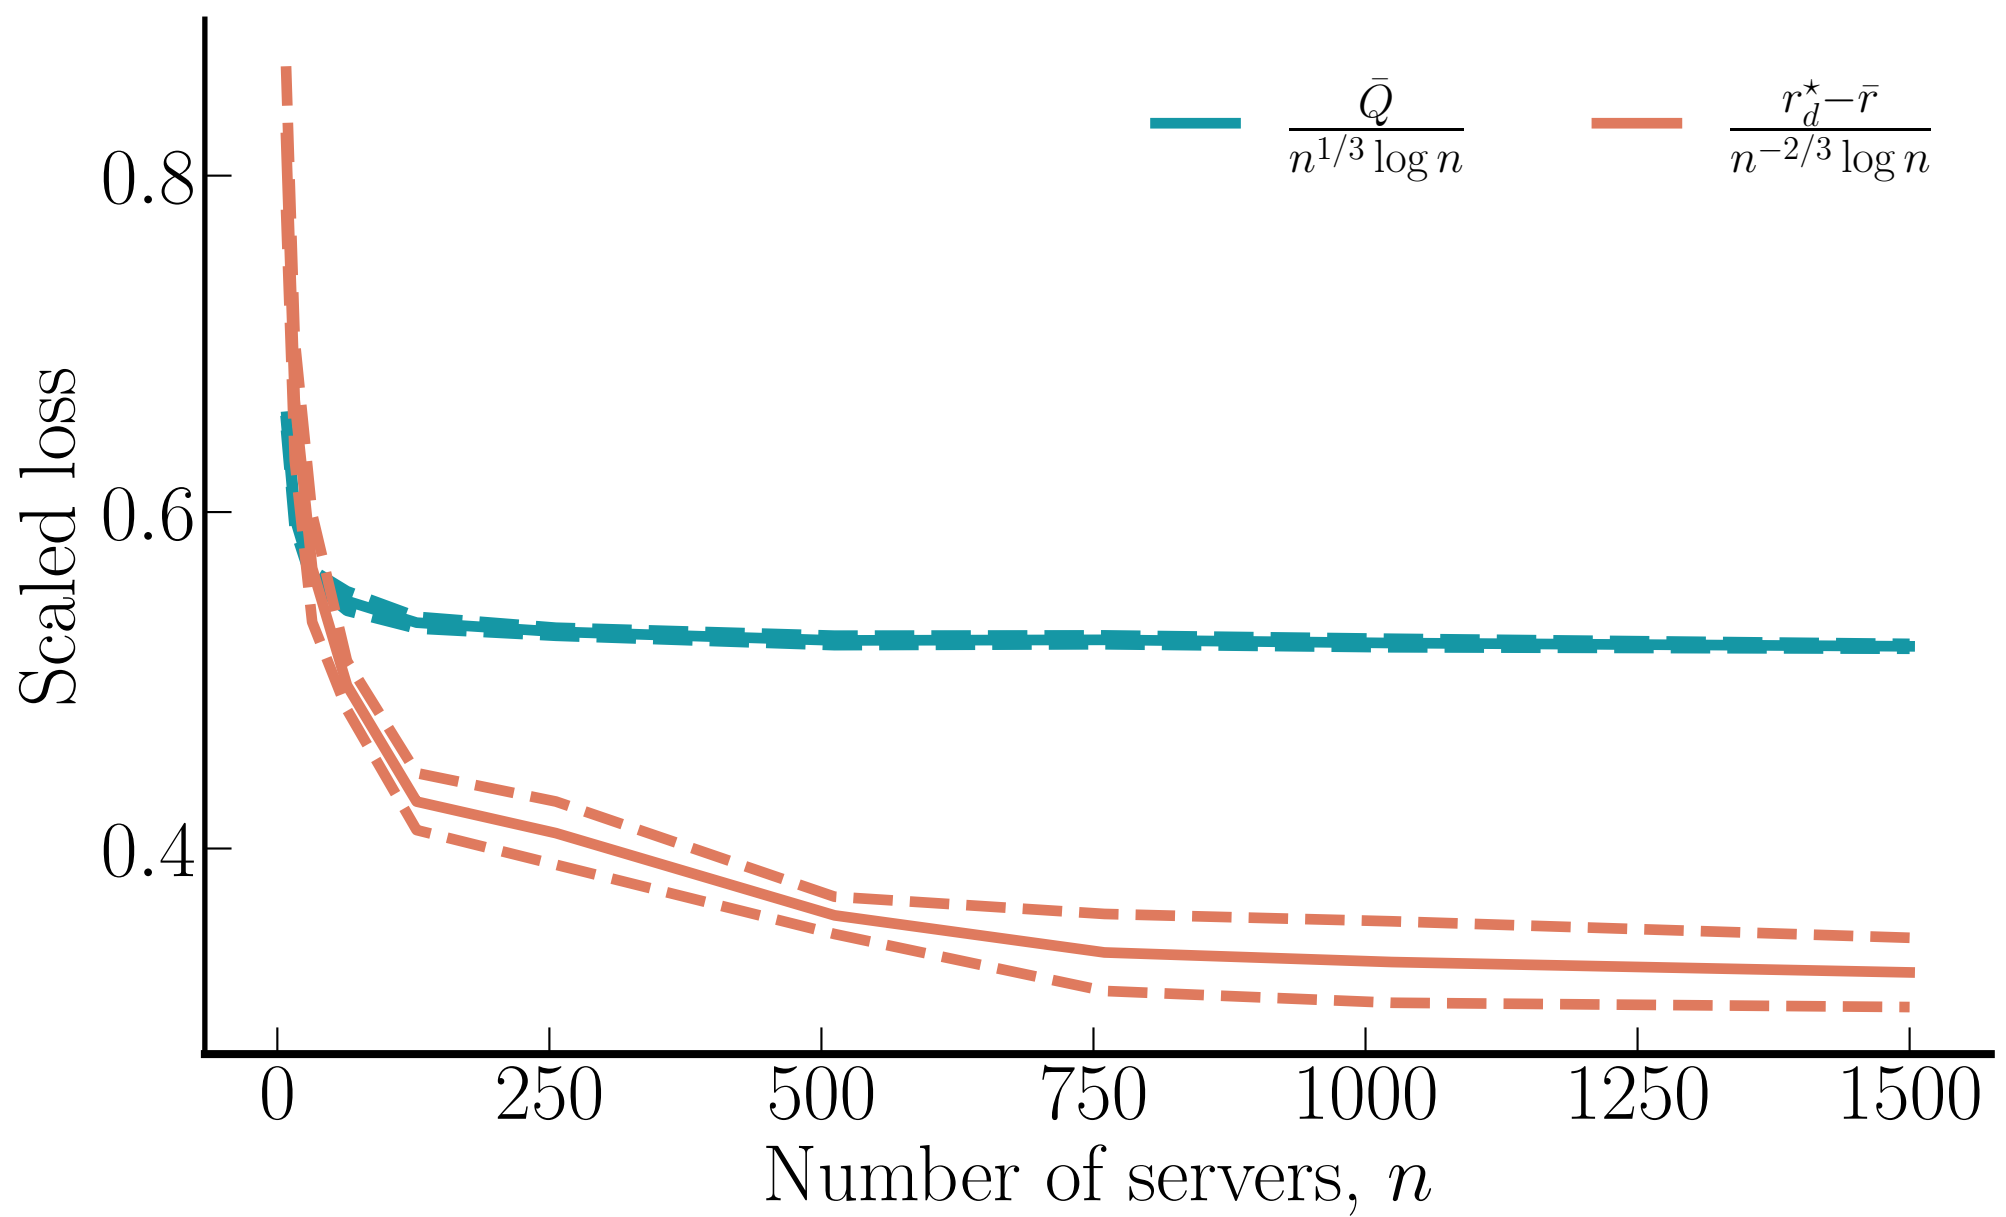

Supplement: opre.2024.1073.cd.zip [file EC2b.pdf › Figures/EC2b.pdf]

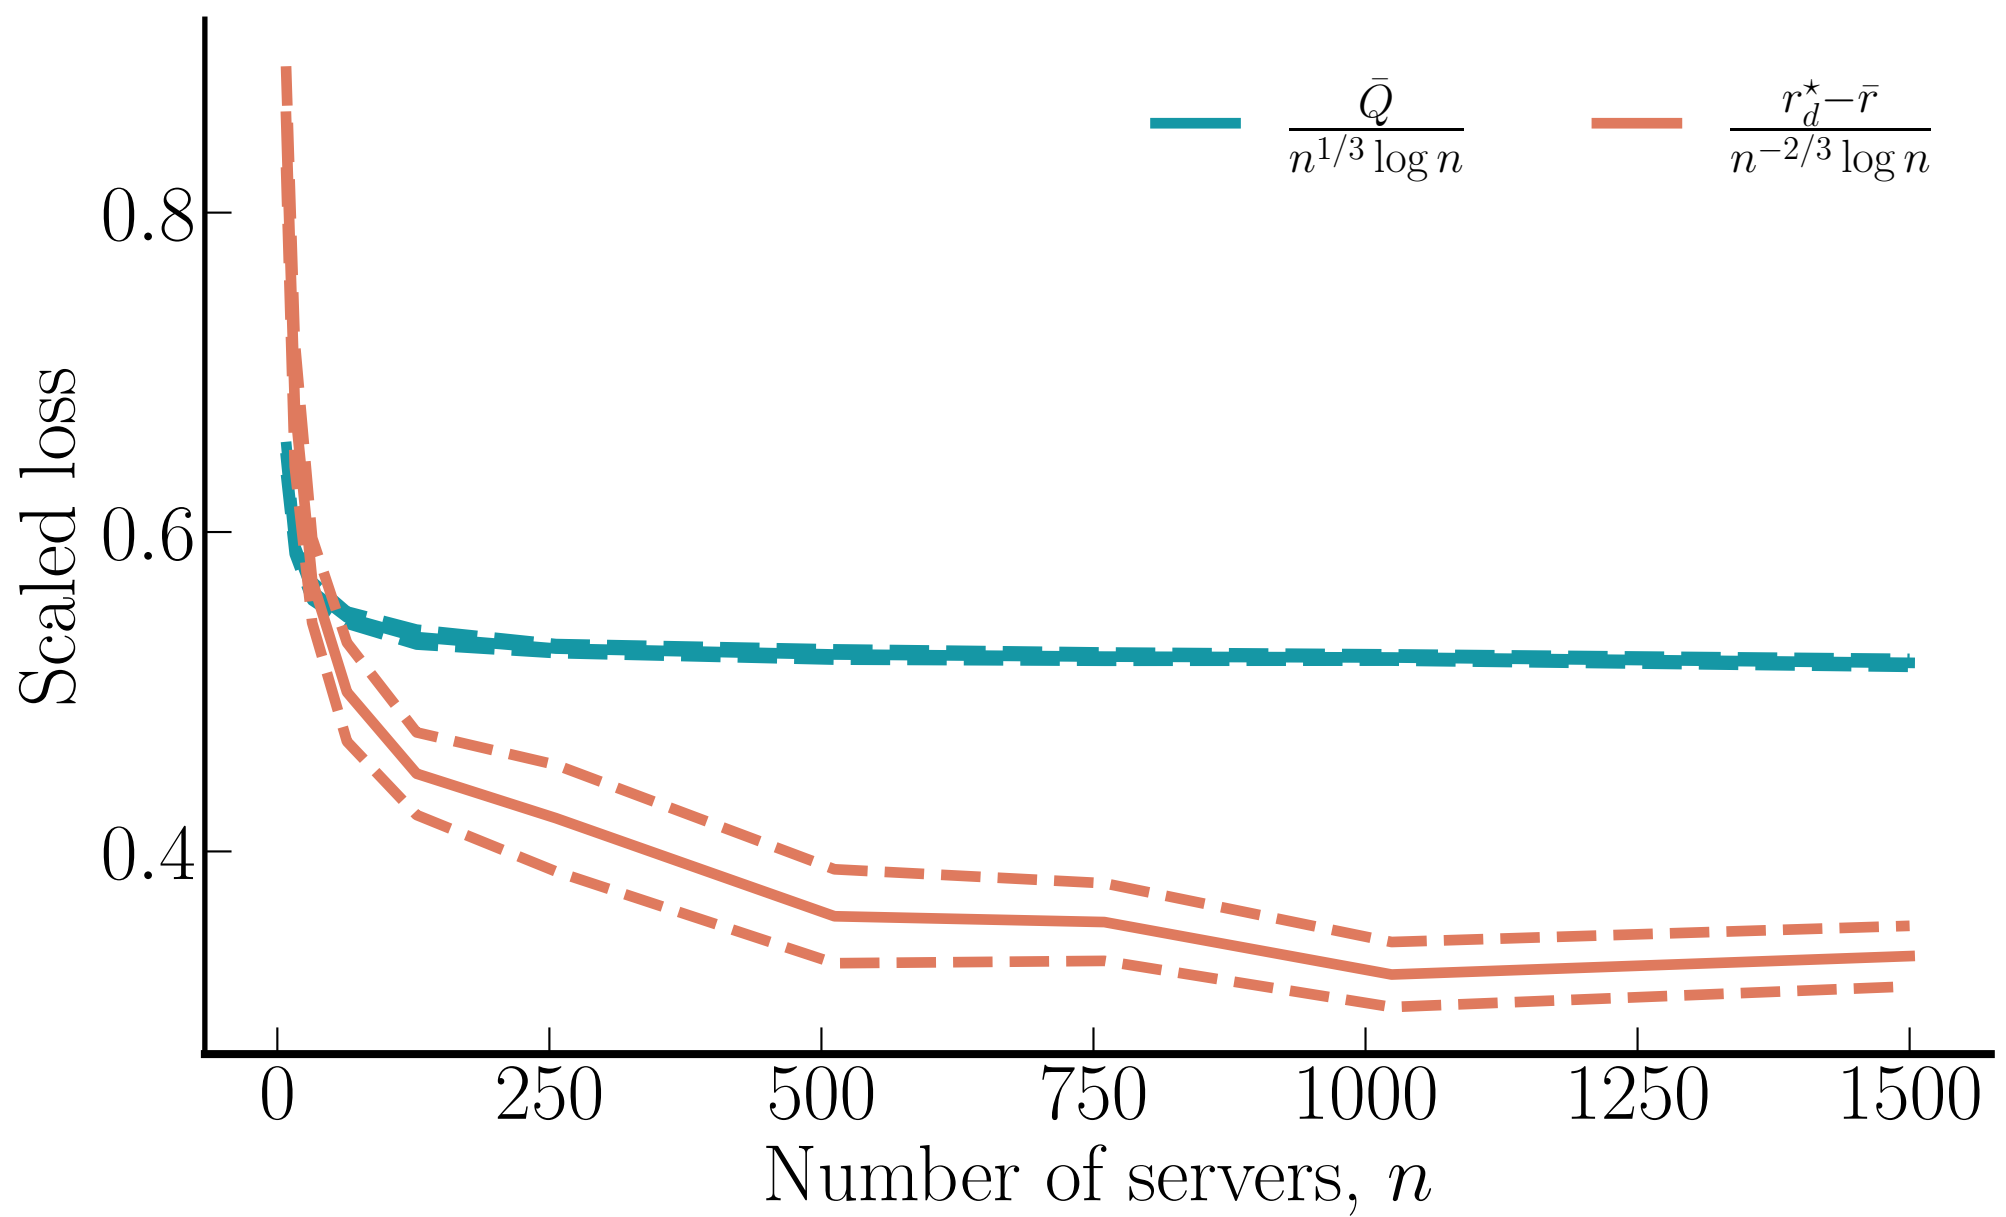

Supplement: opre.2024.1073.cd.zip [file EC2c.pdf › Figures/EC2c.pdf]

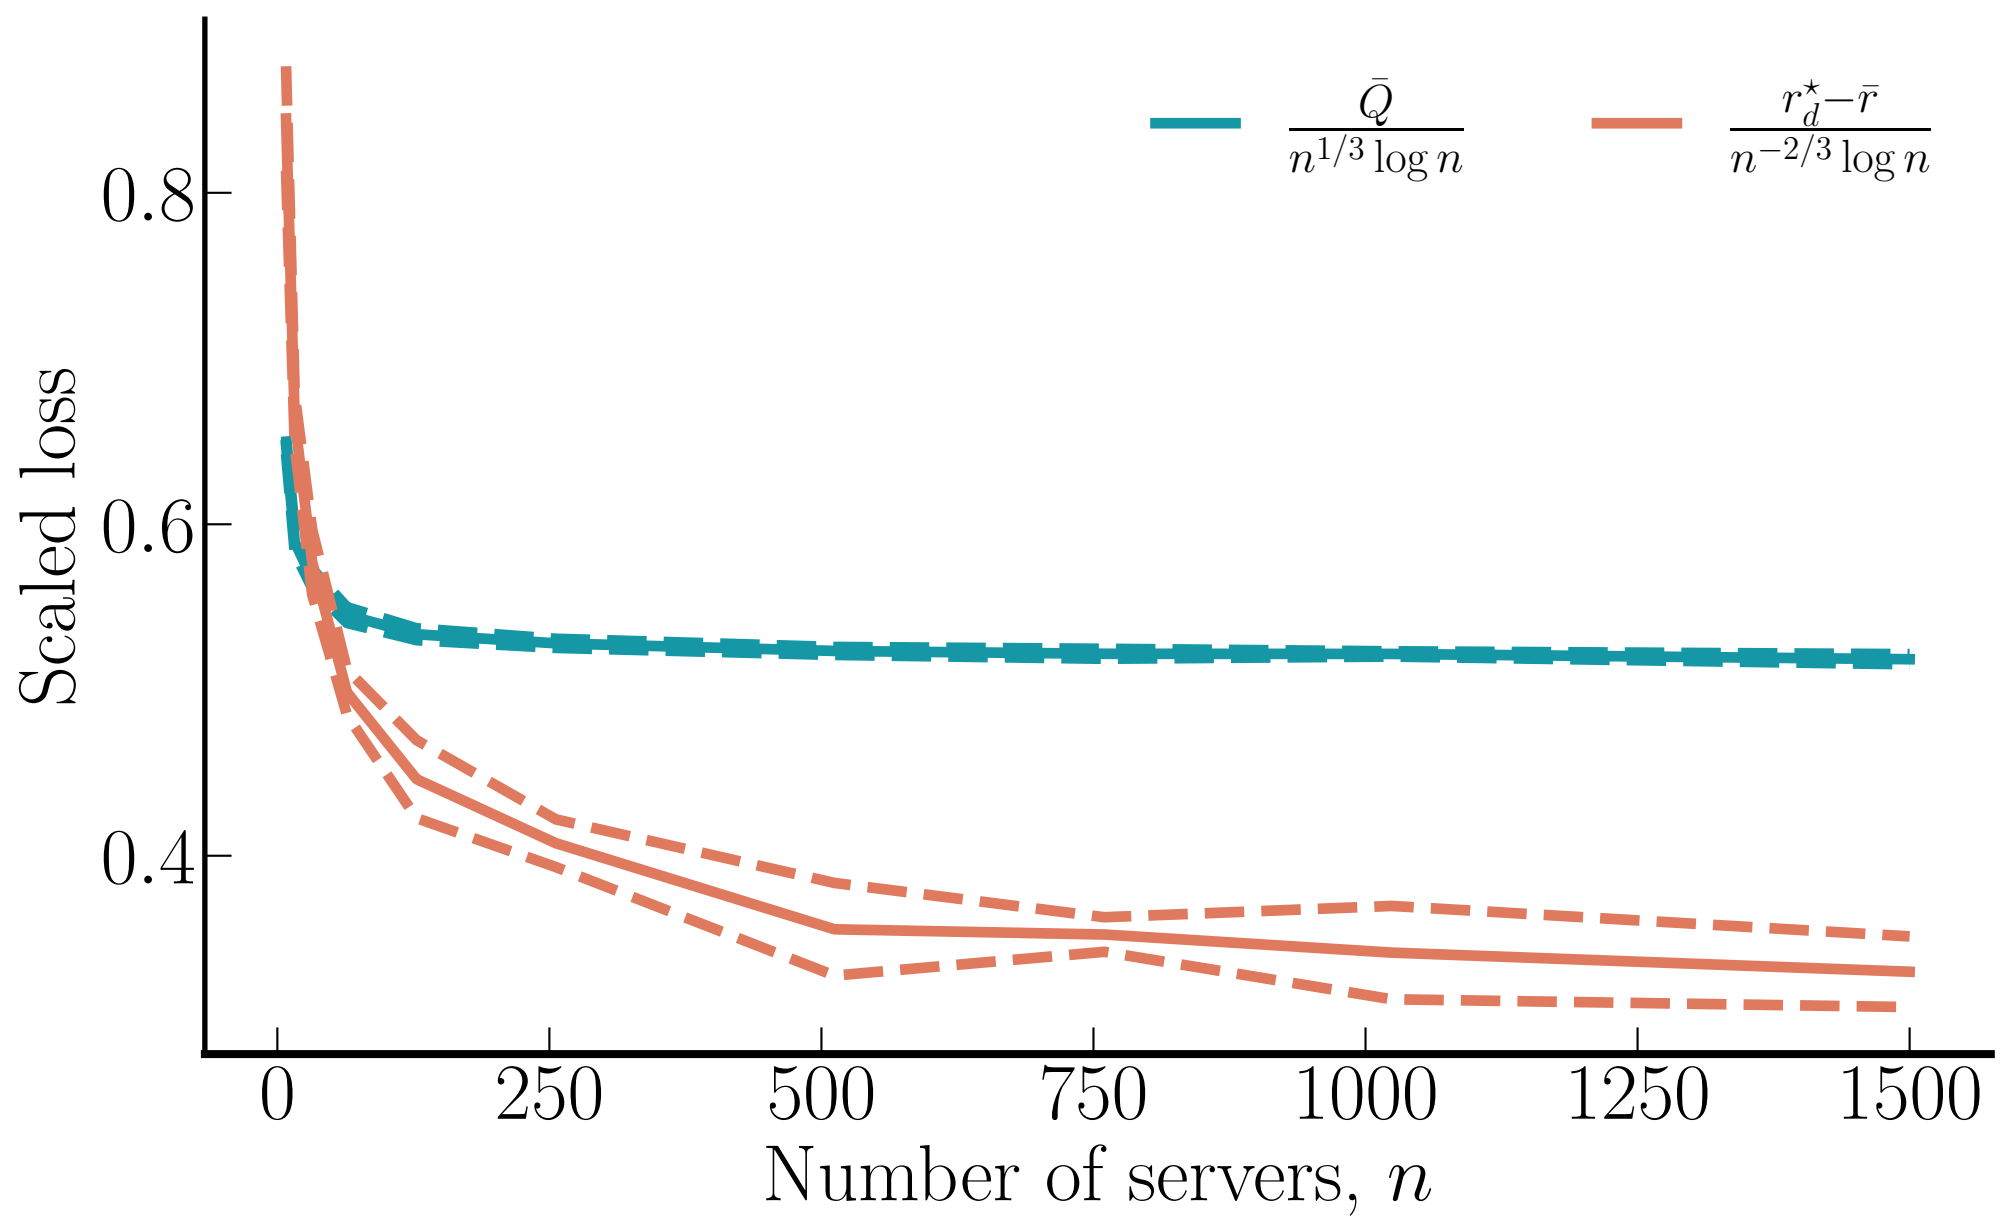

Supplement: opre.2024.1073.cd.zip [file EC2d.pdf › Figures/EC2d.pdf]
